# Supplementary material for: Follicular growth after xenotransplantation of cryopreserved/thawed human ovarian tissue in SCID mice: dynamics and molecular aspects
Source: PubMed Central journal article supplement (PMC5171895; doi:10.1007/s10815-016-0769-2), 2016-07-27

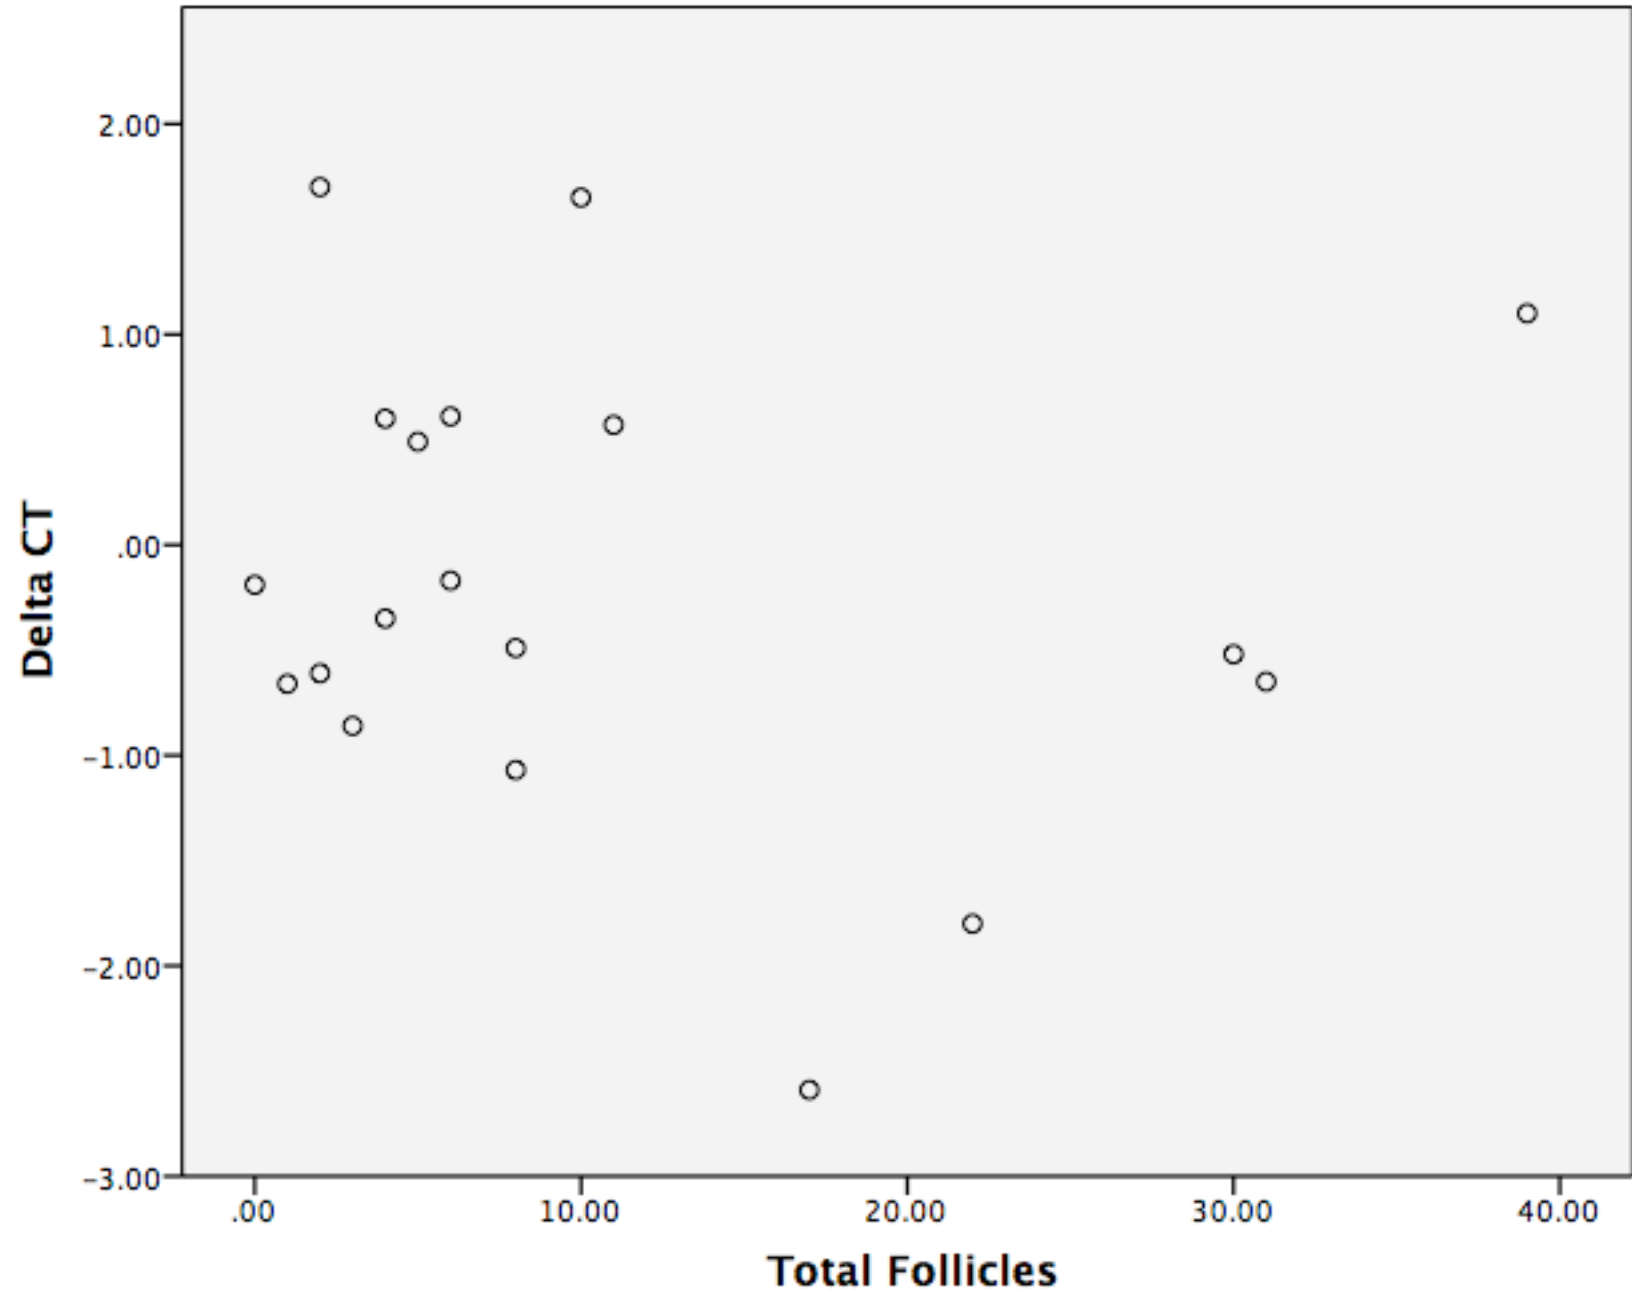

Supplement: 10815_2016_769_MOESM6_ESM.pdf [file 10815_2016_769_MOESM6_ESM.pdf]
